# Supplementary material
Source: PubMed Central journal article supplement (PMC5047842)
Supplement: supp_4.3.E431_COREQ_Checklist.pdf [file supp_4.3.E431_COREQ_Checklist.pdf]

## Consolidated criteria for reporting qualitative studies (COREQ): 32-item checklist

Developed from:  
 Tong A, Sainsbury P, Craig J. Consolidated criteria for reporting qualitative research (COREQ): a 32-item checklist for interviews and focus groups. *International Journal for Quality in Health Care*. 2007. Volume 19, Number 6: pp. 349 – 357

YOU MUST PROVIDE A RESPONSE FOR ALL ITEMS. ENTER N/A IF NOT APPLICABLE

| No. Item                                       | Guide questions/description                                                                                                                       | Reported on Page #                                                        |
|------------------------------------------------|---------------------------------------------------------------------------------------------------------------------------------------------------|---------------------------------------------------------------------------|
| <b>Domain 1: Research team and reflexivity</b> |                                                                                                                                                   |                                                                           |
| <i>Personal Characteristics</i>                |                                                                                                                                                   |                                                                           |
| 1. Inter viewer/facilitator                    | Which author/s conducted the inter view or focus group?<br><b>JEA, SA, NV</b>                                                                     | Last paragraph of "Study participants and setting"                        |
| 2. Credentials                                 | What were the researcher's credentials? E.g. PhD, MD                                                                                              | With authors' names at the beginning of manuscript.<br>Page 1: Title Page |
| 3. Occupation                                  | What was their occupation at the time of the study?                                                                                               | N/A                                                                       |
| 4. Gender                                      | Was the researcher male or female?<br>N/A                                                                                                         | N/A                                                                       |
| 5. Experience and training                     | What experience or training did the researcher have?<br>N/A                                                                                       | N/A                                                                       |
| <i>Relationship with participants</i>          |                                                                                                                                                   |                                                                           |
| 6. Relationship established                    | Was a relationship established prior to study commencement?<br><b>No</b>                                                                          | N/A                                                                       |
| 7. Participant knowledge of the interviewer    | What did the participants know about the researcher? e.g. personal goals, reasons for doing the research                                          | Explained in first sentence of section "Data collection"                  |
| 8. Interviewer characteristics                 | What characteristics were reported about the inter viewer/facilitator? e.g. Bias, assumptions, reasons and interests in the research topic<br>N/A | N/A                                                                       |

|                                          |                                                                                                                                                                                                 |                                         |
|------------------------------------------|-------------------------------------------------------------------------------------------------------------------------------------------------------------------------------------------------|-----------------------------------------|
| <b>Domain 2: study design</b>            |                                                                                                                                                                                                 |                                         |
| <i>Theoretical framework</i>             |                                                                                                                                                                                                 |                                         |
| 9. Methodological orientation and Theory | What methodological orientation was stated to underpin the study? e.g. grounded theory, discourse analysis, ethnography, phenomenology, content analysis<br><b>This was a descriptive study</b> | First line under "Study design"         |
| <i>Participant selection</i>             |                                                                                                                                                                                                 |                                         |
| 10. Sampling                             | How were participants selected? e.g. purposive, convenience, consecutive, snowball<br><b>Purposive</b>                                                                                          | Methods; Study participants and setting |
| 11. Method of approach                   | How were participants approached? e.g. face-to-face, telephone, mail, email<br><b>Telephone, mail, advertisements</b>                                                                           | Methods; Study participants and setting |
| 12. Sample size                          | How many participants were in the study?<br><b>22</b>                                                                                                                                           | Results                                 |
| 13. Non-participation                    | How many people refused to participate or dropped out?<br>Reasons?<br><b>0</b>                                                                                                                  | N/A                                     |
| <i>Setting</i>                           |                                                                                                                                                                                                 |                                         |
| 14. Setting of data collection           | Where was the data collected? e.g. home, clinic, workplace<br><b>Healing Lodge within the Health Centre</b>                                                                                     | Methods; Data collection                |
| 15. Presence of non-participants         | Was anyone else present besides the participants and researchers?<br><b>Mikmac translator</b>                                                                                                   | Methods; Study participants and setting |
| 16. Description of sample                | What are the important characteristics of the sample? e.g. demographic data, date                                                                                                               | First paragraph of results              |
| <i>Data collection</i>                   |                                                                                                                                                                                                 |                                         |
| 17. Interview guide                      | Were questions, prompts, guides provided by the authors? Was it pilot tested?<br><b>Semi-structured discussion guide. Not pilot tested.</b>                                                     | Methods; Data collection                |
| 18. Repeat interviews                    | Were repeat inter views carried out? If yes, how many?<br><b>No</b>                                                                                                                             | Methods; Data collection                |
| 19. Audio/visual recording               | Did the research use audio or visual recording to collect the                                                                                                                                   | Methods; Data collection                |

|                                        |                                                                                                                                               |                           |
|----------------------------------------|-----------------------------------------------------------------------------------------------------------------------------------------------|---------------------------|
|                                        | data?<br><b>Audio recording</b>                                                                                                               |                           |
| 20. Field notes                        | Were field notes made during and/or after the interview or focus group?<br><b>Yes</b>                                                         | Methods; Data collection  |
| 21. Duration                           | What was the duration of the inter views or focus group?<br><b>2 hours</b>                                                                    | Methods; Data collection  |
| 22. Data saturation                    | Was data saturation discussed?<br><b>No</b>                                                                                                   | Strengths and limitations |
| 23. Transcripts returned               | Were transcripts returned to participants for comment and/or correction?<br><b>No</b>                                                         | N/A                       |
| <b>Domain 3: analysis and findings</b> |                                                                                                                                               |                           |
|                                        | <i>Data analysis</i>                                                                                                                          |                           |
| 24. Number of data coders              | How many data coders coded the data?<br><b>Three (NV, SA, JEA)</b>                                                                            | Methods; Data analysis    |
| 25. Description of the coding tree     | Did authors provide a description of the coding tree?<br><b>No</b>                                                                            | N/A                       |
| 26. Derivation of themes               | Were themes identified in advance or derived from the data?<br><b>Derived from data</b>                                                       | Methods; Data analysis    |
| 27. Software                           | What software, if applicable, was used to manage the data?<br><b>N/A</b>                                                                      | N/A                       |
| 28. Participant checking               | Did participants provide feedback on the findings?<br><b>Yes</b>                                                                              | Methods; Data analysis    |
|                                        | <i>Reporting</i>                                                                                                                              |                           |
| 29. Quotations presented               | Were participant quotations presented to illustrate the themes/findings? Was each quotation identified? e.g. participant number<br><b>Yes</b> | Table 1                   |
| 30. Data and findings consistent       | Was there consistency between the data presented and the findings?<br><b>Yes</b>                                                              | Table 1; Results.         |

|                             |                                                                                     |         |
|-----------------------------|-------------------------------------------------------------------------------------|---------|
| 31. Clarity of major themes | Were major themes clearly presented in the findings?<br><b>Yes</b>                  | Results |
| 32. Clarity of minor themes | Is there a description of diverse cases or discussion of minor themes?<br><b>No</b> | N/A     |
